# Supplementary material for: Characterization of Olive Oils Obtained from Minor Accessions in Calabria (Southern Italy)
Source: PubMed Central journal article supplement (PMC7912949; doi:10.3390/foods10020305), 2021-02-02
Supplement: foods-10-00305-s001.pdf [file foods-10-00305-s001.pdf]

**Table 1.** Ripening index of the olives at harvest times.

|                      |          | 2017 | 2018 | 2019 |
|----------------------|----------|------|------|------|
| Ciciarello           | October  | 2,33 | 3,53 | 1,50 |
|                      | November | 4,48 | 4,75 | 3,52 |
| Tonda di Filogaso    | October  | 3,91 | 4,33 | 4,20 |
|                      | November | 4,92 | 6,30 | 6,10 |
| Ottobratica Calipa   | October  | 2,94 | 3,01 | 2,83 |
|                      | November | 4,65 | 4,15 | 4,53 |
| Ottobratica Cannavà  | October  | 3,50 | 3,47 | 3,48 |
|                      | November | 5,03 | 5,00 | 5,02 |
| Ottobratica standard | October  | 2,95 | 3,70 | 3,13 |
|                      | November | 4,40 | 5,27 | 4,94 |

**Table 2.** Qualitative characterization of the Tonda di Filogaso oils.

| TONDA DI FILOGASO            | 2017           |                | 2018           |                 | 2019           |                |
|------------------------------|----------------|----------------|----------------|-----------------|----------------|----------------|
|                              | O              | N              | O              | N               | O              | N              |
| FA (oleic acid %)            | 0,69 ± 0,22    | 0,44 ± 0,04    | 0,39 ± 0,02    | 1,47 ± 1,11     | 0,57 ± 0,08    | 2,50 ± 0,58    |
| PV (mEq O <sub>2</sub> /kg)  | 4,72 ± 0,29    | 1,68 ± 0,29    | 2,22 ± 0,11    | 3,59 ± 1,94     | 3,78 ± 0,13    | 5,49 ± 0,46    |
| K <sub>232</sub>             | 1,92 ± 0,07    | 1,40 ± 0,06    | 1,90 ± 0,23    | 1,62 ± 0,22     | 2,00 ± 0,09    | 1,83 ± 0,05    |
| K <sub>270</sub>             | 0,20 ± 0,01    | 0,10 ± 0,01    | 0,26 ± 0,02    | 0,15 ± 0,05     | 0,19 ± 0,00    | 0,19 ± 0,01    |
| ΔK                           | -0,00 ± 0,00   | -0,00 ± 0,00   | 0,00 ± 0,00    | 0,00 ± 0,00     | 0,00 ± 0,00    | 0,00 ± 0,00    |
| C16:0                        | 14,36 ± 0,13   | 15,10 ± 0,12   | 13,26 ± 0,06   | 15,11 ± 0,13    | 17,58 ± 0,60   | 15,12 ± 0,14   |
| C16:1                        | 1,43 ± 0,05    | 1,39 ± 0,02    | 1,42 ± 0,32    | 1,63 ± 0,24     | 1,63 ± 0,16    | 1,87 ± 0,05    |
| C17:0                        | 0,03 ± 0,00    | 0,16 ± 0,01    | 0,04 ± 0,00    | 0,09 ± 0,06     | 0,19 ± 0,02    | 0,03 ± 0,00    |
| C17:1                        | 0,07 ± 0,01    | 0,30 ± 0,01    | 0,09 ± 0,01    | 0,19 ± 0,11     | 0,35 ± 0,06    | 0,08 ± 0,00    |
| C18:0                        | 1,61 ± 0,46    | 3,14 ± 0,09    | 1,16 ± 0,08    | 3,44 ± 0,34     | 2,40 ± 0,87    | 3,74 ± 0,21    |
| C18:1                        | 73,56 ± 0,85   | 67,11 ± 0,62   | 73,71 ± 2,32   | 68,15 ± 1,25    | 66,07 ± 1,89   | 69,20 ± 0,75   |
| C18:2                        | 7,41 ± 0,3     | 11,52 ± 0,41   | 8,52 ± 2,12    | 10,06 ± 1,59    | 9,73 ± 0,77    | 8,60 ± 0,79    |
| C18:3                        | 0,68 ± 0,01    | 0,47 ± 0,01    | 1,05 ± 0,54    | 0,56 ± 0,09     | 0,76 ± 0,25    | 0,64 ± 0,00    |
| C20:0                        | 0,39 ± 0,00    | 0,41 ± 0,01    | 0,32 ± 0,04    | 0,38 ± 0,04     | 0,31 ± 0,20    | 0,34 ± 0,01    |
| C20:1                        | 0,26 ± 0,01    | 0,22 ± 0,01    | 0,26 ± 0,06    | 0,23 ± 0,01     | 0,33 ± 0,08    | 0,24 ± 0,01    |
| C22:0                        | 0,13 ± 0,01    | 0,13 ± 0,00    | 0,10 ± 0,02    | 0,12 ± 0,01     | 0,43 ± 0,40    | 0,11 ± 0,00    |
| C24:0                        | 0,06 ± 0,00    | 0,06 ± 0,00    | 0,08 ± 0,02    | 0,04 ± 0,02     | 0,20 ± 0,26    | 0,02 ± 0,00    |
| TChl (mg/kg)                 | 5,63 ± 0,98    | 2,41 ± 0,47    | 16,98 ± 1,96   | 3,03 ± 0,90     | 8,03 ± 0,33    | 3,64 ± 0,81    |
| TCa (mg/kg)                  | 3,86 ± 0,85    | 2,16 ± 0,20    | 7,94 ± 0,89    | 2,71 ± 0,64     | 6,13 ± 0,23    | 3,27 ± 0,38    |
| TP (mg/kg)                   | 1.111 ± 107    | 619 ± 72       | 142,36 ± 4,88  | 515,64 ± 129,88 | 592,81 ± 79,04 | 412,2 ± 84,99  |
| TT (mg/kg)                   | 227,11 ± 19,00 | 224,39 ± 10,29 | 219,27 ± 19,01 | 224,39 ± 10,29  | 234,96 ± 15,40 | 224,39 ± 10,29 |
| DPPH assay (% inhibition/mg) | 34,72 ± 2,83   | 19,47 ± 3,85   | 4,37 ± 0,77    | 19,64 ± 2,63    | 22,64 ± 4,34   | 14,15 ± 7,24   |
| ABTS assay (% inhibition/mg) | 31,58 ± 0,30   | 43,63 ± 3,07   | 24,55 ± 1,34   | 31,72 ± 12,11   | 30,92 ± 2,88   | 19,81 ± 0,28   |

**Table 3.** Qualitative characterization of the Ciciarello oils.

| CICIARELLO | 2017 |   | 2018 |   | 2019 |   |
|------------|------|---|------|---|------|---|
|            | O    | N | O    | N | O    | N |

|                                     |                |                |                |                |                |                |
|-------------------------------------|----------------|----------------|----------------|----------------|----------------|----------------|
| <b>FA (oleic acid %)</b>            | 0,69 ± 0,22    | 0,44 ± 0,04    | 0,23 ± 0,01    | 1,24 ± 0,02    | 0,38 ± 0,03    | 0,40 ± 0,04    |
| <b>PV (mEq O<sub>2</sub>/kg)</b>    | 4,72 ± 0,29    | 1,68 ± 0,29    | 2,46 ± 0,17    | 5,13 ± 0,12    | 2,95 ± 0,25    | 2,78 ± 0,34    |
| <b>K<sub>232</sub></b>              | 1,92 ± 0,07    | 1,40 ± 0,06    | 1,18 ± 0,62    | 1,34 ± 0,15    | 2,08 ± 0,18    | 1,72 ± 0,14    |
| <b>K<sub>270</sub></b>              | 0,20 ± 0,01    | 0,10 ± 0,01    | 0,13 ± 0,08    | 0,19 ± 0,02    | 0,25 ± 0,01    | 0,20 ± 0,05    |
| <b>ΔK</b>                           | 0,69 ± 0,22    | 0,44 ± 0,04    | -0,01 ± 0,00   | 0,00 ± 0,00    | 0,00 ± 0,00    | 0,00 ± 0,00    |
| <b>C16:0</b>                        | 13,17 ± 0,22   | 14,67 ± 0,25   | 13,67 ± 1,24   | 12,64 ± 0,02   | 12,86 ± 0,48   | 13,22 ± 0,59   |
| <b>C16:1</b>                        | 1,15 ± 0,23    | 1,30 ± 0,04    | 1,04 ± 0,25    | 0,91 ± 0,00    | 0,79 ± 0,00    | 0,88 ± 0,03    |
| <b>C17:0</b>                        | 0,04 ± 0,00    | 0,15 ± 0,02    | 0,08 ± 0,06    | 0,06 ± 0,00    | 0,05 ± 0,00    | 0,04 ± 0,01    |
| <b>C17:1</b>                        | 0,07 ± 0,01    | 0,26 ± 0,02    | 0,17 ± 0,12    | 0,11 ± 0,00    | 0,07 ± 0,00    | 0,08 ± 0,00    |
| <b>C18:0</b>                        | 2,22 ± 0,22    | 2,77 ± 0,20    | 1,39 ± 0,39    | 0,99 ± 0,08    | 3,33 ± 1,26    | 3,90 ± 2,35    |
| <b>C18:1</b>                        | 75,04 ± 2,09   | 67,92 ± 0,54   | 75,79 ± 3,89   | 77,65 ± 0,10   | 76,55 ± 1,78   | 75,27 ± 2,30   |
| <b>C18:2</b>                        | 6,92 ± 1,90    | 11,63 ± 0,48   | 6,23 ± 1,83    | 5,99 ± 0,01    | 4,74 ± 0,10    | 5,13 ± 0,28    |
| <b>C18:3</b>                        | 0,52 ± 0,01    | 0,46 ± 0,01    | 0,62 ± 0,03    | 0,60 ± 0,01    | 0,60 ± 0,02    | 0,50 ± 0,01    |
| <b>C20:0</b>                        | 0,42 ± 0,05    | 0,44 ± 0,00    | 0,47 ± 0,01    | 0,47 ± 0,00    | 0,51 ± 0,01    | 0,48 ± 0,01    |
| <b>C20:1</b>                        | 0,27 ± 0,04    | 0,22 ± 0,00    | 0,32 ± 0,01    | 0,34 ± 0,00    | 0,32 ± 0,01    | 0,32 ± 0,02    |
| <b>C22:0</b>                        | 0,13 ± 0,02    | 0,13 ± 0,01    | 0,15 ± 0,00    | 0,18 ± 0,00    | 0,17 ± 0,01    | 0,16 ± 0,01    |
| <b>C24:0</b>                        | 0,05 ± 0,01    | 0,05 ± 0,00    | 0,08 ± 0,00    | 0,08 ± 0,00    | 0,01 ± 0,01    | 0,01 ± 0,00    |
| <b>TChl (mg/kg)</b>                 | 5,63 ± 0,98    | 2,41 ± 0,47    | 13,91 ± 1,95   | 2,96 ± 0,38    | 11,83 ± 1,74   | 4,57 ± 0,67    |
| <b>TCa (mg/kg)</b>                  | 3,86 ± 0,85    | 2,16 ± 0,20    | 6,72 ± 1,00    | 2,58 ± 0,19    | 9,70 ± 1,45    | 4,75 ± 0,62    |
| <b>TP (mg/kg)</b>                   | 1.111 ± 107    | 619 ± 72       | 367,50 ± 11,45 | 300,45 ± 7,67  | 392,75 ± 46,25 | 419,44 ± 37,29 |
| <b>TT (mg/kg)</b>                   | 288,60 ± 18,30 | 241,77 ± 30,39 | 272,88 ± 7,46  | 261,00 ± 33,24 | 304,32 ± 10,92 | 222,54 ± 1,85  |
| <b>DPPH assay (% inhibition/mg)</b> | 14,62 ± 2,22   | 13,42 ± 2,53   | 43,38 ± 0,82   | 14,13 ± 0,36   | 18,20 ± 1,82   | 13,83 ± 4,35   |
| <b>ABTS assay (% inhibition/mg)</b> | 31,58 ± 0,30   | 43,63 ± 3,07   | 45,00 ± 1,33   | 23,04 ± 0,98   | 29,09 ± 3,76   | 19,65 ± 2,07   |

Table 4. Qualitative characterization of the Ottobratica Calipa oils.

| OTTOBRATICA CALIPA               | 2017           |                 | 2018           |               | 2019              |                |
|----------------------------------|----------------|-----------------|----------------|---------------|-------------------|----------------|
|                                  | O              | N               | O              | N             | O                 | N              |
| <b>FA (oleic acid %)</b>         | 0,36 ± 0,11    | 0,40 ± 0,07     | 0,86 ± 0,02    | 1,44 ± 0,19   | 0,49 ± 0,10       | 0,37 ± 0,02    |
| <b>PV (mEq O<sub>2</sub>/kg)</b> | 1,56 ± 0,55    | 1,60 ± 0,14     | 2,96 ± 0,16    | 2,96 ± 0,14   | 3,61 ± 0,27       | 4,87 ± 1,52    |
| <b>K<sub>232</sub></b>           | 1,62 ± 0,03    | 1,58 ± 0,07     | 2,48 ± 0,03    | 1,87 ± 0,23   | 2,14 ± 0,11       | 2,00 ± 0,10    |
| <b>K<sub>270</sub></b>           | 0,15 ± 0,01    | 0,13 ± 0,03     | 0,33 ± 0,06    | 0,29 ± 0,06   | 0,20 ± 0,02       | 0,24 ± 0,02    |
| <b>ΔK</b>                        | 0,00 ± 0,00    | 0,00 ± 0,00     | 0,00 ± 0,00    | 0,00 ± 0,00   | 0,01 ± 0,01       | 0,00 ± 0,00    |
| <b>C16:0</b>                     | 14,96 ± 0,01   | 12,63 ± 0,15    | 16,00 ± 0,15   | 15,50 ± 0,23  | 10,62 ± 2,88      | 15,35 ± 0,19   |
| <b>C16:1</b>                     | 2,00 ± 0,00    | 1,12 ± 0,04     | 2,29 ± 0,15    | 1,98 ± 0,18   | 0,61 ± 0,30       | 1,82 ± 0,19    |
| <b>C17:0</b>                     | 0,02 ± 0,01    | 0,02 ± 0,02     | 0,05 ± 0,03    | 0,07 ± 0,03   | 0,05 ± 0,01       | 0,03 ± 0,00    |
| <b>C17:1</b>                     | 0,08 ± 0,00    | 0,07 ± 0,01     | 0,14 ± 0,04    | 0,16 ± 0,04   | 0,06 ± 0,01       | 0,08 ± 0,00    |
| <b>C18:0</b>                     | 1,96 ± 0,12    | 2,42 ± 0,09     | 1,39 ± 0,18    | 0,61 ± 0,09   | 0,64 ± 0,36       | 3,16 ± 0,55    |
| <b>C18:1</b>                     | 71,79 ± 0,09   | 76,40 ± 0,29    | 67,76 ± 0,33   | 68,60 ± 1,08  | 77,84 ± 1,39      | 68,77 ± 0,13   |
| <b>C18:2</b>                     | 7,73 ± 0,09    | 6,07 ± 0,23     | 10,73 ± 0,26   | 11,33 ± 0,65  | 8,33 ± 4,98       | 9,37 ± 0,32    |
| <b>C18:3</b>                     | 0,68 ± 0,00    | 0,44 ± 0,02     | 0,79 ± 0,02    | 0,81 ± 0,07   | 0,74 ± 0,17       | 0,66 ± 0,02    |
| <b>C20:0</b>                     | 0,35 ± 0,00    | 0,41 ± 0,01     | 0,35 ± 0,02    | 0,37 ± 0,02   | 0,53 ± 0,04       | 0,34 ± 0,01    |
| <b>C20:1</b>                     | 0,26 ± 0,00    | 0,25 ± 0,02     | 0,32 ± 0,01    | 0,36 ± 0,01   | 0,22 ± 0,12       | 0,30 ± 0,01    |
| <b>C22:0</b>                     | 0,10 ± 0,00    | 0,12 ± 0,01     | 0,13 ± 0,01    | 0,14 ± 0,01   | 0,12 ± 0,08       | 0,10 ± 0,00    |
| <b>C24:0</b>                     | 0,05 ± 0,00    | 0,05 ± 0,01     | 0,07 ± 0,01    | 0,07 ± 0,01   | 0,04 ± 0,02       | 0,01 ± 0,00    |
| <b>TChl (mg/kg)</b>              | 6,55 ± 1,97    | 2,40 ± 0,44     | 8,90 ± 1,66    | 1,24 ± 0,16   | 5,54 ± 0,25       | 3,95 ± 0,32    |
| <b>TCa (mg/kg)</b>               | 5,27 ± 0,99    | 2,22 ± 0,39     | 5,34 ± 1,06    | 1,30 ± 0,10   | 4,90 ± 0,26       | 3,26 ± 0,30    |
| <b>TP (mg/kg)</b>                | 227,72 ± 53,60 | 796,01 ± 122,20 | 521,57 ± 20,83 | 214,48 ± 9,07 | 1.104,49 ± 143,13 | 326,92 ± 52,55 |

|                              |                |                |                |                |                |                |
|------------------------------|----------------|----------------|----------------|----------------|----------------|----------------|
| TT (mg/kg)                   | 323.71 ± 17.81 | 308.80 ± 32.68 | 321,20 ± 18.89 | 333,77 ± 15.08 | 326,22 ± 16.29 | 283,84 ± 25.73 |
| DPPH assay (% inhibition/mg) | 9,19 ± 0.84    | 29,98 ± 2.54   | 35,16 ± 0.82   | 13,42 ± 0.63   | 19,16 ± 2.76   | 18,10 ± 2.90   |
| ABTS assay (% inhibition/mg) | 13,67 ± 1.84   | 36,83 ± 2.03   | 36,42 ± 2.39   | 23,43 ± 1.39   | 19,77 ± 3.45   | 14,02 ± 1.26   |

Table 5. Qualitative characterization of the Ottobratica Cannavà oils.

| OTTOBRATICA CANNAVA'         | 2017           |                | 2018           |                | 2019            |                 |
|------------------------------|----------------|----------------|----------------|----------------|-----------------|-----------------|
|                              | O              | N              | O              | N              | O               | N               |
| FA (oleic acid %)            | 0,41 ± 0.00    | 0,44 ± 0.04    | 0,64 ± 0.02    | 0,66 ± 0.01    | 0,53 ± 0.13     | 0,55 ± 0.13     |
| PV (mEq O <sub>2</sub> /kg)  | 4,86 ± 0.86    | 4,58 ± 0.29    | 2,90 ± 0.08    | 6,57 ± 0.10    | 3,88 ± 1.27     | 5,58 ± 1.12     |
| K <sub>232</sub>             | 1,39 ± 0.03    | 1,38 ± 0.03    | 2,24 ± 0.11    | 2,10 ± 0.05    | 1,82 ± 0.47     | 1,74 ± 0.40     |
| K <sub>270</sub>             | 0,05 ± 0.02    | 0,05 ± 0.01    | 0,30 ± 0.04    | 0,21 ± 0.03    | 0,18 ± 0.14     | 0,13 ± 0.09     |
| ΔK                           | 0,00 ± 0.00    | 0,00 ± 0.00    | 0,00 ± 0.00    | 0,00 ± 0.00    | 0,00 ± 0.00     | 0,00 ± 0.00     |
| C16:0                        | 11,48 ± 0.09   | 11,40 ± 0.11   | 15,32 ± 1.40   | 15,44 ± 0.04   | 13,40 ± 2.37    | 13,42 ± 2.22    |
| C16:1                        | 0,79 ± 0.05    | 0,79 ± 0.09    | 1,35 ± 0.17    | 2,01 ± 0.02    | 1,07 ± 0.33     | 1,40 ± 0.67     |
| C17:0                        | 0,02 ± 0.00    | 0,04 ± 0.00    | 0,17 ± 0.09    | 0,06 ± 0.00    | 0,09 ± 0.11     | 0,05 ± 0.01     |
| C17:1                        | 0,07 ± 0.00    | 0,07 ± 0.00    | 0,19 ± 0.08    | 0,13 ± 0.00    | 0,13 ± 0.09     | 0,10 ± 0.03     |
| C18:0                        | 2,57 ± 0.14    | 2,89 ± 0.05    | 1,33 ± 0.29    | 0,78 ± 0.06    | 1,95 ± 0.72     | 1,84 ± 1.16     |
| C18:1                        | 78,26 ± 0.36   | 78,02 ± 0.36   | 69,48 ± 0.97   | 70,34 ± 0.09   | 73,87 ± 4.88    | 74,18 ± 4.22    |
| C18:2                        | 5,45 ± 0.22    | 5,42 ± 0.24    | 10,12 ± 0.51   | 9,63 ± 0.02    | 7,78 ± 2.59     | 7,52 ± 2.31     |
| C18:3                        | 0,45 ± 0.03    | 0,46 ± 0.04    | 1,04 ± 0.50    | 0,76 ± 0.00    | 0,74 ± 0.50     | 0,61 ± 0.17     |
| C20:0                        | 0,45 ± 0.02    | 0,45 ± 0.02    | 0,45 ± 0.01    | 0,36 ± 0.00    | 0,45 ± 0.02     | 0,41 ± 0.05     |
| C20:1                        | 0,25 ± 0.03    | 0,26 ± 0.02    | 0,32 ± 0.03    | 0,30 ± 0.01    | 0,29 ± 0.05     | 0,28 ± 0.03     |
| C22:0                        | 0,14 ± 0.00    | 0,14 ± 0.01    | 0,15 ± 0.01    | 0,12 ± 0.01    | 0,15 ± 0.01     | 0,13 ± 0.02     |
| C24:0                        | 0,05 ± 0.01    | 0,05 ± 0.01    | 0,09 ± 0.01    | 0,06 ± 0.00    | 0,07 ± 0.02     | 0,06 ± 0.01     |
| TChl (mg/kg)                 | 3,42 ± 0.61    | 2,70 ± 0.09    | 9,27 ± 1.96    | 9,69 ± 0.43    | 6,35 ± 3.58     | 6,19 ± 3.84     |
| TCa (mg/kg)                  | 2,53 ± 0.23    | 2,21 ± 0.12    | 7,42 ± 0.23    | 8,71 ± 0.48    | 4,98 ± 2.69     | 5,46 ± 3.58     |
| TP (mg/kg)                   | 986,49 ± 66.43 | 984,27 ± 38.79 | 569,86 ± 23.47 | 406.19 ± 6.82  | 778,18 ± 234.63 | 695,23 ± 318.09 |
| TT (mg/kg)                   | 548,00 ± 36.18 | 312,33 ± 8.38  | 641,47 ± 39.87 | 259.22 ± 15.93 | 594,74 ± 66.03  | 285,78 ± 32.26  |
| DPPH assay (% inhibition/mg) | 33,52 ± 4.70   | 27,74 ± 2.54   | 35,89 ± 1.30   | 24.41 ± 0.34   | 34.71 ± 3.65    | 26.07 ± 2.46    |
| ABTS assay (% inhibition/mg) | 57,60 ± 11.14  | 48,46 ± 7.33   | 33,75 ± 1.43   | 26.57 ± 0.47   | 45,67 ± 15.69   | 37.52 ± 13.27   |

Table 6. Qualitative characterization of the Ottobratica oils collected.

| OTTOBRATICA                 | 2017         |              | 2018         |              | 2019         |              |
|-----------------------------|--------------|--------------|--------------|--------------|--------------|--------------|
|                             | O            | N            | O            | N            | O            | N            |
| FA (oleic acid %)           | 0,30 ± 0.03  | 0,46 ± 0.08  | 0,42 ± 0.01  | 0,47 ± 0.02  | 0,47 ± 0.08  | 2,62 ± 0.14  |
| PV (mEq O <sub>2</sub> /kg) | 1,67 ± 0.24  | 1,88 ± 0.08  | 2,20 ± 0.14  | 7,53 ± 0.00  | 3,05 ± 0.18  | 10,47 ± 1.39 |
| K <sub>232</sub>            | 1,49 ± 0.04  | 1,37 ± 0.02  | 2,02 ± 0.14  | 2,53 ± 0.20  | 1,90 ± 0.06  | 1,64 ± 0.13  |
| K <sub>270</sub>            | 0,13 ± 0.00  | 0,11 ± 0.01  | 0,27 ± 0.02  | 0,24 ± 0.02  | 0,18 ± 0.01  | 0,24 ± 0.02  |
| ΔK                          | 0,00 ± 0.00  | 0,00 ± 0.00  | 0,00 ± 0.00  | 0,00 ± 0.00  | 0,00 ± 0.00  | 0,01 ± 0.00  |
| C16:0                       | 15,89 ± 0.17 | 14,33 ± 0.10 | 16,25 ± 0.07 | 15,11 ± 0.10 | 15,09 ± 0.72 | 15,44 ± 1.80 |
| C16:1                       | 1,37 ± 0.07  | 1,90 ± 0.03  | 1,45 ± 0.01  | 1,23 ± 0.00  | 1,93 ± 0.11  | 1,34 ± 0.44  |
| C17:0                       | 0,19 ± 0.01  | 0,02 ± 0.00  | 0,17 ± 0.00  | 0,16 ± 0.00  | 0,19 ± 0.23  | 0,12 ± 0.05  |
| C17:1                       | 0,31 ± 0.02  | 0,07 ± 0.01  | 0,30 ± 0.00  | 0,28 ± 0.01  | 1,56 ± 2.10  | 0,21 ± 0.09  |
| C18:0                       | 2,92 ± 0.12  | 2,06 ± 0.14  | 1,89 ± 0.32  | 1,25 ± 0.06  | 2,66 ± 1.27  | 2,00 ± 0.74  |
| C18:1                       | 67,59 ± 0.33 | 71,40 ± 0.59 | 68,51 ± 0.32 | 71,06 ± 0.13 | 69,39 ± 1.56 | 70,02 ± 4.78 |

---

|                                     |                |                 |                |                |                  |               |
|-------------------------------------|----------------|-----------------|----------------|----------------|------------------|---------------|
| <b>C18:2</b>                        | 10,34 ± 0.14   | 8,83 ± 0.42     | 9,73 ± 0.04    | 9,15 ± 0.01    | 7,77 ± 0.35      | 9,43 ± 3.13   |
| <b>C18:3</b>                        | 0,52 ± 0.01    | 0,66 ± 0.03     | 0,69 ± 0.01    | 0,70 ± 0.00    | 0,64 ± 0.02      | 0,54 ± 0.02   |
| <b>C20:0</b>                        | 0,44 ± 0.00    | 0,35 ± 0.00     | 0,45 ± 0.01    | 0,46 ± 0.00    | 0,35 ± 0.02      | 0,44 ± 0.02   |
| <b>C20:1</b>                        | 0,22 ± 0.01    | 0,26 ± 0.02     | 0,31 ± 0.01    | 0,29 ± 0.00    | 0,26 ± 0.02      | 0,28 ± 0.02   |
| <b>C22:0</b>                        | 0,14 ± 0.00    | 0,10 ± 0.00     | 0,16 ± 0.00    | 0,15 ± 0.00    | 0,14 ± 0.02      | 0,16 ± 0.01   |
| <b>C24:0</b>                        | 0,06 ± 0.00    | 0,04 ± 0.00     | 0,10 ± 0.02    | 0,07 ± 0.00    | 0,02 ± 0.00      | 0,02 ± 0.00   |
| <b>TChl (mg/kg)</b>                 | 5,36 ± 0.52    | 2,13 ± 0.37     | 12,74 ± 1.93   | 3,90 ± 0.62    | 8,19 ± 2.27      | 4,52 ± 0.27   |
| <b>TCa (mg/kg)</b>                  | 4,03 ± 0.33    | 2,10 ± 0.37     | 6,97 ± 0.69    | 3,61 ± 0.49    | 6,16 ± 1.21      | 4,24 ± 0.06   |
| <b>TP (mg/kg)</b>                   | 345,06 ± 13.30 | 562,86 ± 108.44 | 188,15 ± 15.46 | 406,82 ± 1.39  | 1148,10 ± 127.89 | 32,90 ± 10.39 |
| <b>TT (mg/kg)</b>                   | 265,83 ± 40.50 | 237,99 ± 30.54  | 296,47 ± 16.70 | 264,20 ± 21.21 | 235,19 ± 33.52   | 211,78 ± 6.45 |
| <b>DPPH assay (% inhibition/mg)</b> | 28,42 ± 5.60   | 15,21 ± 1.53    | 17,08 ± 1.70   | 30,01 ± 0.05   | 20,42 ± 4.44     | 1,65 ± 0.40   |
| <b>ABTS assay (% inhibition/mg)</b> | 16,64 ± 1.42   | 59,85 ± 4.56    | 32,72 ± 0.97   | 29,78 ± 2.46   | 27,09 ± 3.40     | 6,57 ± 1.05   |

---
